# Supplementary material for: Ecological zoning for climate policy and global change studies
Source: Springer Nature journal article supplement (doi:10.1038/s41893-024-01416-5), 2024-08-29
Supplement: 41893_2024_1416_MOESM2_ESM.pdf [file 41893_2024_1416_MOESM2_ESM.pdf]

## Reporting Summary

Nature Portfolio wishes to improve the reproducibility of the work that we publish. This form provides structure for consistency and transparency in reporting. For further information on Nature Portfolio policies, see our [Editorial Policies](#) and the [Editorial Policy Checklist](#).

### Statistics

For all statistical analyses, confirm that the following items are present in the figure legend, table legend, main text, or Methods section.

n/a Confirmed

- |                                     |                                     |                                                                                                                                                                                                                                                            |
|-------------------------------------|-------------------------------------|------------------------------------------------------------------------------------------------------------------------------------------------------------------------------------------------------------------------------------------------------------|
| <input checked="" type="checkbox"/> | <input type="checkbox"/>            | The exact sample size ( $n$ ) for each experimental group/condition, given as a discrete number and unit of measurement                                                                                                                                    |
| <input checked="" type="checkbox"/> | <input type="checkbox"/>            | A statement on whether measurements were taken from distinct samples or whether the same sample was measured repeatedly                                                                                                                                    |
| <input checked="" type="checkbox"/> | <input type="checkbox"/>            | The statistical test(s) used AND whether they are one- or two-sided<br><i>Only common tests should be described solely by name; describe more complex techniques in the Methods section.</i>                                                               |
| <input checked="" type="checkbox"/> | <input type="checkbox"/>            | A description of all covariates tested                                                                                                                                                                                                                     |
| <input checked="" type="checkbox"/> | <input type="checkbox"/>            | A description of any assumptions or corrections, such as tests of normality and adjustment for multiple comparisons                                                                                                                                        |
| <input type="checkbox"/>            | <input checked="" type="checkbox"/> | A full description of the statistical parameters including central tendency (e.g. means) or other basic estimates (e.g. regression coefficient) AND variation (e.g. standard deviation) or associated estimates of uncertainty (e.g. confidence intervals) |
| <input checked="" type="checkbox"/> | <input type="checkbox"/>            | For null hypothesis testing, the test statistic (e.g. $F$ , $t$ , $r$ ) with confidence intervals, effect sizes, degrees of freedom and $P$ value noted<br><i>Give <math>P</math> values as exact values whenever suitable.</i>                            |
| <input checked="" type="checkbox"/> | <input type="checkbox"/>            | For Bayesian analysis, information on the choice of priors and Markov chain Monte Carlo settings                                                                                                                                                           |
| <input checked="" type="checkbox"/> | <input type="checkbox"/>            | For hierarchical and complex designs, identification of the appropriate level for tests and full reporting of outcomes                                                                                                                                     |
| <input checked="" type="checkbox"/> | <input type="checkbox"/>            | Estimates of effect sizes (e.g. Cohen's $d$ , Pearson's $r$ ), indicating how they were calculated                                                                                                                                                         |

*Our web collection on [statistics for biologists](#) contains articles on many of the points above.*

### Software and code

Policy information about [availability of computer code](#)

Data collection

Provide a description of all commercial, open source and custom code used to collect the data in this study, specifying the version used OR state that no software was used.

Data analysis

Data analysis done via Google Earth Engine JavaScript API

For manuscripts utilizing custom algorithms or software that are central to the research but not yet described in published literature, software must be made available to editors and reviewers. We strongly encourage code deposition in a community repository (e.g. GitHub). See the Nature Portfolio [guidelines for submitting code & software](#) for further information.

### Data

Policy information about [availability of data](#)

All manuscripts must include a [data availability statement](#). This statement should provide the following information, where applicable:

- Accession codes, unique identifiers, or web links for publicly available datasets
- A description of any restrictions on data availability
- For clinical datasets or third party data, please ensure that the statement adheres to our [policy](#)

Data availability statement

All data used in this article is publicly available and correctly referenced by the authors. The authors mainly used climate data from CRU and elevation data from USGS EROS. The codes and assets are made available via the links below on google earth engine.

Climate data from CRU can be accessed via the following link: <https://crudata.uea.ac.uk/cru/data/hrg/>  
 Elevation data from USGS EROS can be accessed via the following link:  
<https://www.usgs.gov/centers/eros/science/usgs-eros-archive-digital-elevation-global-30-arc-second-elevation-gtopo30>

#### Code availability statement

The entire code can be accessed via the following link: [https://code.earthengine.google.com/?accept\\_repo=users/philipaudebert/HLZs](https://code.earthengine.google.com/?accept_repo=users/philipaudebert/HLZs)  
 The assets can also directly be accessed via the following links:  
<https://code.earthengine.google.com/?asset=users/philipaudebert/HLZ/Level1>  
<https://code.earthengine.google.com/?asset=users/philipaudebert/HLZ/Level2>  
<https://code.earthengine.google.com/?asset=users/philipaudebert/HLZ/Level3>

The code can also be accessed on Github via the following link:  
<https://github.com/phil-aud/ecological-zoning>

## Human research participants

Policy information about [studies involving human research participants and Sex and Gender in Research](#).

|                             |                                  |
|-----------------------------|----------------------------------|
| Reporting on sex and gender | <input type="text" value="n/a"/> |
| Population characteristics  | <input type="text" value="n/a"/> |
| Recruitment                 | <input type="text" value="n/a"/> |
| Ethics oversight            | <input type="text" value="n/a"/> |

Note that full information on the approval of the study protocol must also be provided in the manuscript.

## Field-specific reporting

Please select the one below that is the best fit for your research. If you are not sure, read the appropriate sections before making your selection.

Life sciences     Behavioural & social sciences     Ecological, evolutionary & environmental sciences

For a reference copy of the document with all sections, see [nature.com/documents/nr-reporting-summary-flat.pdf](https://www.nature.com/documents/nr-reporting-summary-flat.pdf)

## Ecological, evolutionary & environmental sciences study design

All studies must disclose on these points even when the disclosure is negative.

|                          |                                                                                                                                                                                                                                                                                                                                                                                                                                                                                                                                                                                                                   |
|--------------------------|-------------------------------------------------------------------------------------------------------------------------------------------------------------------------------------------------------------------------------------------------------------------------------------------------------------------------------------------------------------------------------------------------------------------------------------------------------------------------------------------------------------------------------------------------------------------------------------------------------------------|
| Study description        | <input type="text" value="Study on Ecological Zoning of the World"/>                                                                                                                                                                                                                                                                                                                                                                                                                                                                                                                                              |
| Research sample          | <input type="text" value="The authors did not use a research sample but rather used climatic data from CRU. CRU TS (Climatic Research Unit gridded Time Series) is a widely used climate dataset on a 0.5° latitude by 0.5° longitude grid over all land domains of the world except Antarctica. It is derived by the interpolation of monthly climate anomalies from extensive networks of weather station observations."/>                                                                                                                                                                                      |
| Sampling strategy        | <input type="text" value="n/a"/>                                                                                                                                                                                                                                                                                                                                                                                                                                                                                                                                                                                  |
| Data collection          | <input type="text" value="n/a"/>                                                                                                                                                                                                                                                                                                                                                                                                                                                                                                                                                                                  |
| Timing and spatial scale | <input type="text" value="1901-2022, monthly time series from publicly available climate data of CRU"/>                                                                                                                                                                                                                                                                                                                                                                                                                                                                                                           |
| Data exclusions          | <input (23="" (±3="" +4sd="" 12="" 1961–1990,="" 75%="" a="" and="" anomalies="" anomalies.="" are="" based="" be="" construct="" convert="" deviations,="" each="" exceeding="" first="" for="" in="" into="" is="" mean="" minimum="" months="" more)="" must="" observations="" of="" omitted."="" on="" or="" outlying="" period="" pre)="" present="" process="" processed.="" sd,="" series="" stage="" standard="" station="" the="" this="" threshold="" tmp;="" to="" type="text" used="" value="The original dataset of CRU was used and no additional data was excluded. CRU states that " values=""/> |
| Reproducibility          | <input type="text" value="n/a"/>                                                                                                                                                                                                                                                                                                                                                                                                                                                                                                                                                                                  |
| Randomization            | <input type="text" value="n/a because CRU uses historic observational climate data without any manipulation or controlled experiments."/>                                                                                                                                                                                                                                                                                                                                                                                                                                                                         |
| Blinding                 | <input type="text" value="n/a because the authors did not use a randomised controlled trial."/>                                                                                                                                                                                                                                                                                                                                                                                                                                                                                                                   |

Did the study involve field work?  Yes  No

## Reporting for specific materials, systems and methods

We require information from authors about some types of materials, experimental systems and methods used in many studies. Here, indicate whether each material, system or method listed is relevant to your study. If you are not sure if a list item applies to your research, read the appropriate section before selecting a response.

### Materials & experimental systems

| n/a                                 | Involvement in the study                               |
|-------------------------------------|--------------------------------------------------------|
| <input checked="" type="checkbox"/> | <input type="checkbox"/> Antibodies                    |
| <input checked="" type="checkbox"/> | <input type="checkbox"/> Eukaryotic cell lines         |
| <input checked="" type="checkbox"/> | <input type="checkbox"/> Palaeontology and archaeology |
| <input checked="" type="checkbox"/> | <input type="checkbox"/> Animals and other organisms   |
| <input checked="" type="checkbox"/> | <input type="checkbox"/> Clinical data                 |
| <input checked="" type="checkbox"/> | <input type="checkbox"/> Dual use research of concern  |

### Methods

| n/a                                 | Involvement in the study                        |
|-------------------------------------|-------------------------------------------------|
| <input checked="" type="checkbox"/> | <input type="checkbox"/> ChIP-seq               |
| <input checked="" type="checkbox"/> | <input type="checkbox"/> Flow cytometry         |
| <input checked="" type="checkbox"/> | <input type="checkbox"/> MRI-based neuroimaging |
